# Supplementary material
Source: publisher site journal article supplement (https://www.spandidos-publications.com/1643/downloadSupplementary)

Figure S1. Heparin itself does not affect the expression of the myofibroblast markers  $\alpha$ -SMA and  $\text{coll}\alpha 1$  in fibroblast-like synoviocytes. Cells were starved and then cultured with heparin (15  $\mu\text{g}/\text{ml}$ ) alone for 24 h. The relative expression levels of the myofibroblast markers  $\alpha$ -SMA and  $\text{coll}\alpha 1$  were then evaluated using reverse transcription-quantitative PCR. Data represent the mean  $\pm$  SD (n=4).  $\alpha$ -SMA,  $\alpha$ -smooth muscle actin;  $\text{coll}\alpha 1$ ,  $\alpha 1$  chain of collagen type I.

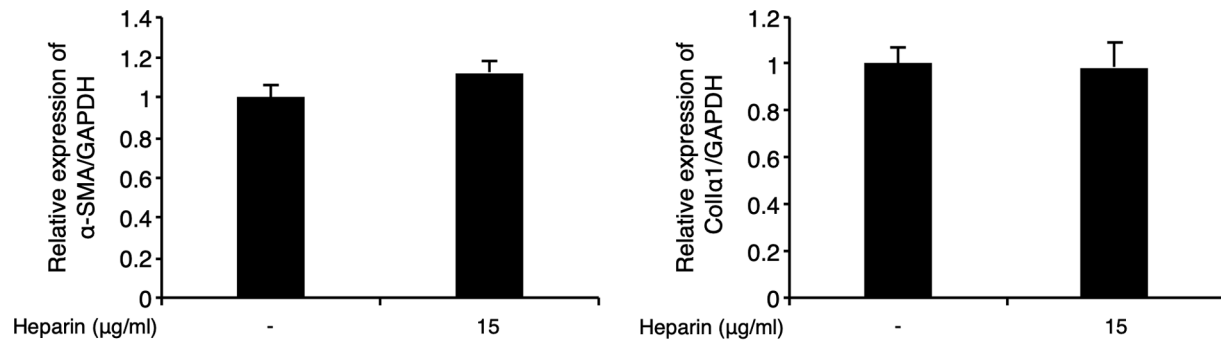

Figure S2. Neither the NF- $\kappa$ B inhibitor BAY 11-7085 nor the IKK-2 inhibitor TPCA-1 abrogated the IL-1 $\beta$ - and TNF- $\alpha$ -mediated suppression of the myofibroblast marker expression in fibroblast-like synoviocytes. Cells were starved and then cultured with IL-1 $\beta$  (10 ng/ml) and TNF- $\alpha$  (10 ng/ml), with or without the NF- $\kappa$ B inhibitor BAY 11-7085 or the IKK-2 inhibitor TPCA-1 for 24 h. The relative expression levels of the myofibroblast markers  $\alpha$ -SMA and coll $\alpha$ 1 were then evaluated using reverse transcription-quantitative PCR. Data are presented as the mean  $\pm$  SD (n=4). \*P<0.01.  $\alpha$ -smooth muscle actin; coll $\alpha$ 1,  $\alpha$ 1 chain of collagen type I; IL, interleukin; TNF- $\alpha$ , tumor necrosis factor  $\alpha$ .

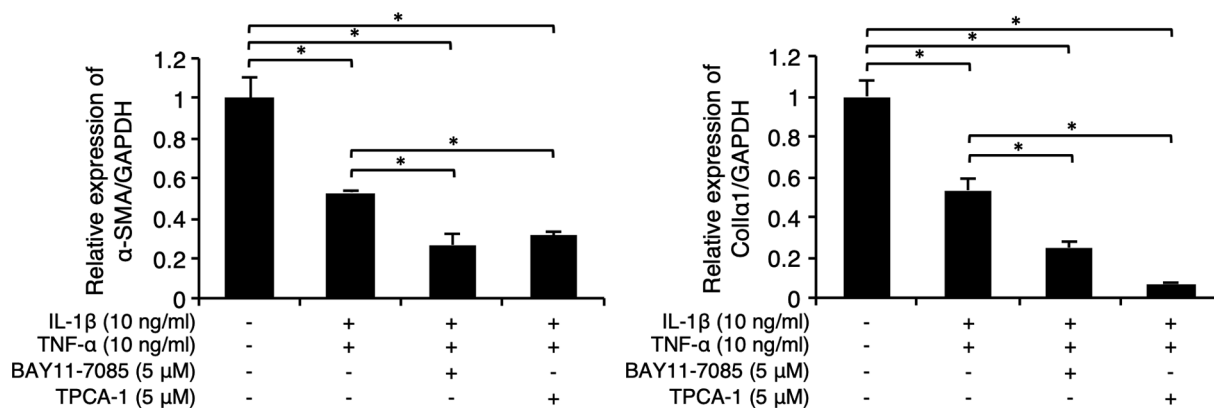

Supplement: Supplementary file 1 [file downloadSupplementary]
